# Supplementary material for: Synergistic Effects of DHA and Sucrose on Body Weight Gain in PUFA-Deficient Elovl2 -/- Mice
Source: PubMed Central journal article supplement (PMC6520711; doi:10.3390/nu11040852), 2019-04-15
Supplement: nutrients-11-00852-s001.pdf [file nutrients-11-00852-s001.pdf]

## Supporting information

Table S1. Primer sequences

| <b>Genes</b> | <b>Primer</b> | <b>Sequence</b>           |
|--------------|---------------|---------------------------|
| GLUT4        | Forward       | GCTTTGTGGCCTTCTTTGAG      |
|              | Reverse       | CAGGAGGACGGCAAATAGAA      |
| CPT1         | Forward       | GCGCTCTTAGGACTACTTGCTAACC |
|              | Reverse       | ACTGGAGACCTGAGAGAGGAATGT  |
| PPARgamma    | Forward       | GAAAGACAACGGACAAATCACC    |
|              | Reverse       | GGGGGTGATATTTTGAACCTTG    |
| Elovl3       | Forward       | GCCTCTCATCCTCTGGTCCT      |
|              | Reverse       | TGCCATAAACTTCCACATCCT     |
| CART         | Forward       | TGGATGATGCGTCCCATG        |
|              | Reverse       | CGGAATGCGTTTACTCTTGAGC    |
| NPY          | Forward       | CGCTCTGCGACACTACATCAA     |
|              | Reverse       | GGGCTGGATCTCTTGCCAT       |
| AgRP         | Forward       | GGTGCTAGATCCACAGAACCG     |
|              | Reverse       | CCAAGCAGGACTCGTGCAG       |
| POMC         | Forward       | CGAGGCCTTTCCCCTAGAGT      |
|              | Reverse       | CCAGGACTTGCTCCAAGCC       |
| leptin       | Forward       | GTGGTGGCTGGTGTGATGAT      |
|              | Reverse       | TTGATGAGGTGACCAAGGTG      |
| adiponectin  | Forward       | GGAGAGAAAGGAGATGCAGGT     |
|              | Reverse       | CTTTCCTGCCAGGGGTTTC       |
| 18S          | Forward       | AGTCCCTGCCCTTTGTACACA     |
|              | Reverse       | CGATCCGAGGGCCTCACTA       |
| TFIIB        | Forward       | GTTCTGCTCCAACCTTTGCCT     |
|              | Reverse       | TGTGTAGCTGCCATCTGCACTT    |

| <b>A</b>            |  | <b>Wt</b>    | <b>KO</b>    |
|---------------------|--|--------------|--------------|
| <u>HS (control)</u> |  | 87,02 ± 0,33 | 87,33 ± 0,24 |
| <u>HS</u>           |  | 87,33 ± 0,38 | 87,56 ± 0,24 |
| <u>HSDHA</u>        |  | 86,93 ± 0,14 | 87,37 ± 0,11 |
| <b>B</b>            |  | <b>Wt</b>    | <b>KO</b>    |
| <u>HS (control)</u> |  | 87,19 ± 0,27 | 87,55 ± 0,16 |
| <u>HS/HSHF</u>      |  | 87,31 ± 0,27 | 87,30 ± 0,06 |
| <u>HSDHA/HSHF</u>   |  | 87,33 ± 0,06 | 87,55 ± 0,10 |

**Table S2. Apparent food absorption efficiency**

Apparent mass absorption efficiency calculated as the ratio of the ingested mass minus the excreted mass (feces mass) to mass ingested at two time points: at the shifting point from DHA635 enriched or deficient diet to high fat diet (**A**) and after 2 weeks of high fat diet treatment (at 636 week 6) (**B**). Values were normalized by arcsine transformation.

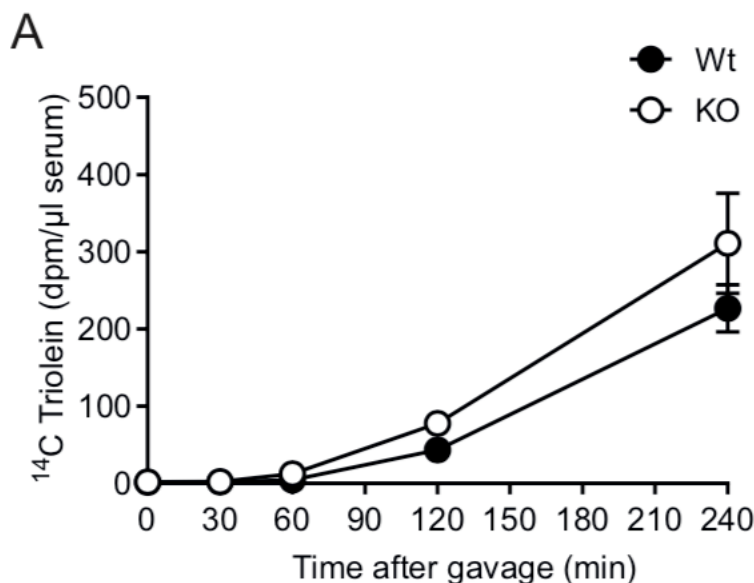

**Figure S1. Intestinal lipid uptake test**

18-20-week-old wild-type and *Elovl2*<sup>-/-</sup> mice, maintained on low-sucrose diet, were fasted overnight and then injected with tyloxapol (Lipase inhibitor) 15 minutes prior to gavage of olive oil traced with <sup>14</sup>C-triolein. Blood was collected 30, 60, 120 and 240 minutes post gavage to measure radioactive tracer recovery. Results shown are means of 6 mice ± SEM.

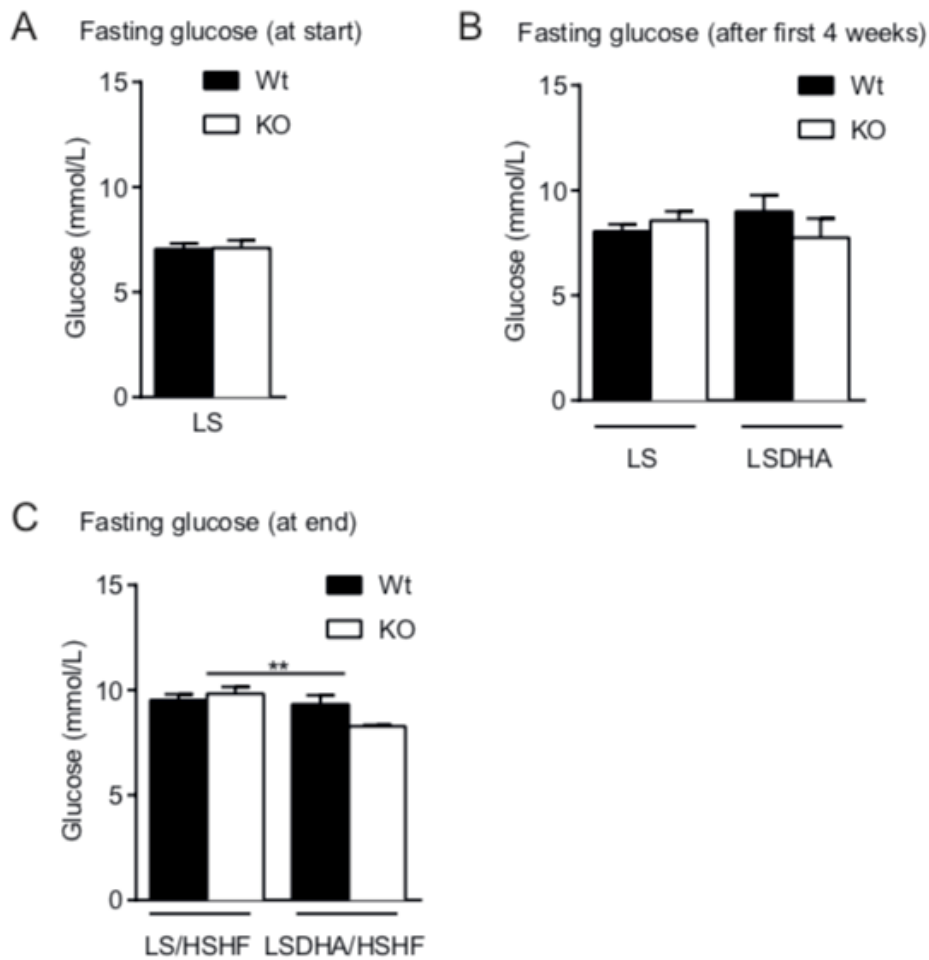

**Figure S2. Fasting glucose concentration in blood.**

Glucose levels in wild-type and *Elovl2*<sup>-/-</sup> mice were measured at the beginning of the experiment, after 4 weeks of pre-treatment with low-sucrose or low-sucrose DHA-enriched diet (LSDHA), and at the end of 4 weeks of high-sucrose, high-fat diet (HSHF) feeding. Animals were fasted for 6 hours prior to the analysis. Results shown are means of 4 mice  $\pm$  SEM. Statistical significances are shown between groups  $**P < 0.01$ .

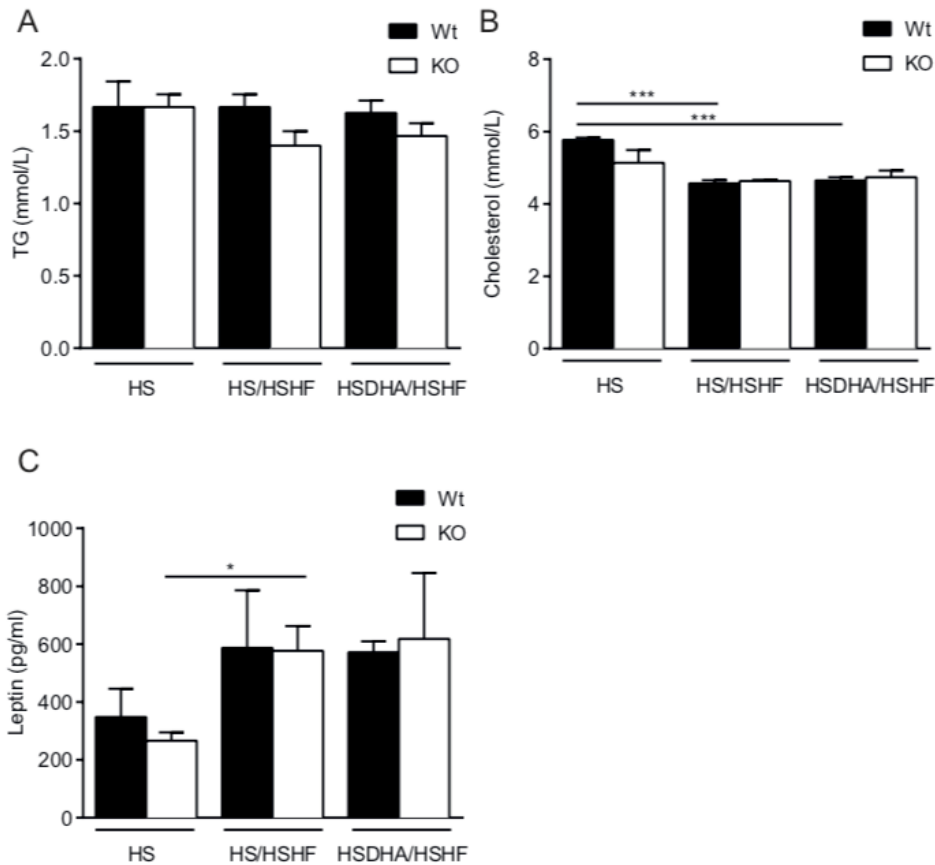

**Figure S3. Parameters of lipid metabolism in the blood.**

Triglyceride (TG), cholesterol and leptin levels were analyzed in blood and serum of wild-type and *Elov12*<sup>-/-</sup> mice that were fed high-sucrose (HS) for 8 weeks and high-sucrose or high- sucrose DHA-enriched diet for 4 weeks followed by high-sucrose, high-fat diet (HS/HSHF and HSDHA/HSHF respectively) for 4 weeks. Serum samples for leptin and insulin measurements were collected at the end point of experiment; triglyceride and cholesterol levels were measured in after the GTT at 6 weeks of treatment (4 weeks of pre-treatment and 2 weeks of high-sucrose, high-fat diet (HSHF)). Results shown are means of 4 mice  $\pm$  SEM. Statistical significances are shown between groups \*  $P < 0.05$ . \*\*\*  $P < 0.001$
